1 **Genome-wide association study of habitual physical activity in over 277,000 UK Biobank**  
2 **participants identifies multiple variants including *CADM2* and *APOE***

3 Short Title: Genome-wide association study of habitual physical activity

4 Yann C. Klimentidis<sup>1\*</sup>, David A. Raichlen<sup>2</sup>, Jennifer Bea<sup>3,4</sup>, David O. Garcia<sup>5</sup>, Lawrence J. Mandarino<sup>6</sup>,  
5 Gene E. Alexander<sup>7</sup>, Zhao Chen<sup>1</sup>, Scott B. Going<sup>4</sup>

6 <sup>1</sup> Department of Epidemiology and Biostatistics, Mel and Enid Zuckerman College of Public Health,  
7 University of Arizona, Tucson, Arizona, USA

8 <sup>2</sup> School of Anthropology, University of Arizona, Tucson, Arizona, USA

9 <sup>3</sup> Department of Medicine, University of Arizona, Tucson, Arizona, USA

10 <sup>4</sup> Department of Nutritional Sciences, University of Arizona, Tucson, Arizona, USA

11 <sup>5</sup> Department of Health Promotion Sciences, Mel and Enid Zuckerman College of Public Health,  
12 University of Arizona, Tucson, Arizona, USA

13 <sup>6</sup> Center for Disparities in Diabetes, Obesity and Metabolism, Division of Endocrinology, Diabetes and  
14 Metabolism, Department of Medicine, University of Arizona, Tucson, Arizona, USA

15 <sup>7</sup> Departments of Psychology and Psychiatry, Neuroscience and Physiological Sciences Interdisciplinary  
16 Programs, BIO5 Institute, and Evelyn F. McKnight Brain Institute, University of Arizona, Tucson,  
17 Arizona, USA; Arizona Alzheimer's Consortium, Phoenix, Arizona, USA

18 **\* Corresponding Author:** Department of Epidemiology and Biostatistics, Mel and Enid Zuckerman  
19 College of Public Health, University of Arizona, Tucson, Arizona, 85724, 520-621-0147,  
20 [yann@email.arizona.edu](mailto:yann@email.arizona.edu)

21 **Conflict of interest:** The authors declare no conflict of interest.

22 **Abstract**

23 **Background/Objectives:** Physical activity (PA) protects against a wide range of diseases. Engagement in  
24 habitual PA has been shown to be heritable, motivating the search for specific genetic variants that may  
25 ultimately inform efforts to promote PA and target the best type of PA for each individual.

26 **Subjects/Methods:** We used data from the UK Biobank to perform the largest genome-wide association  
27 study of PA to date, using three measures based on self-report (n=277,656) and two measures based on  
28 wrist-worn accelerometry data (n=67,808). We examined genetic correlations of PA with other traits and  
29 diseases, as well as tissue-specific gene expression patterns. With data from the Atherosclerosis Risk in  
30 Communities (ARIC; n=8,556) study, we performed a meta-analysis of our top hits for moderate-to-  
31 vigorous PA (MVPA).

32 **Results:** We identified 26 genome-wide loci across the five PA measures examined. Upon meta-analysis  
33 of the top hits for MVPA with results from the ARIC study, 8 of 10 remained significant at  $p < 5 \times 10^{-8}$ .  
34 Interestingly, among these, the rs429358 variant in the *APOE* gene was the most strongly associated with  
35 MVPA. Variants in *CADM2*, a gene recently implicated in risk-taking behavior and other personality and  
36 cognitive traits, were found to be associated with regular engagement in strenuous sports or other  
37 exercises. We also identified thirteen loci consistently associated ( $p < 0.005$ ) with each of the five PA  
38 measures. We find genetic correlations of PA with educational attainment traits, chronotype, psychiatric  
39 traits, and obesity-related traits. Tissue enrichment analyses implicate the brain and pituitary gland as  
40 locations where PA-associated loci may exert their actions.

41 **Conclusions:** These results provide new insight into the genetic basis of habitual PA, and the genetic  
42 links connecting PA with other traits and diseases.

## 43 **Introduction**

44 A physically active lifestyle has been shown to protect against a wide range of diseases, including  
45 cardiovascular disease, cancer, type-2 diabetes, osteoporosis, and Alzheimer's disease<sup>1-4</sup>. Levels of  
46 engagement in physical activity (PA) vary across individuals, and most people do not meet recommended  
47 levels to achieve health benefits. Although cultural, economic, and other environmental factors influence  
48 PA engagement<sup>5,6</sup>, genetic factors also likely play a role. Understanding the genetic factors underlying  
49 inter-individual variation will better inform efforts to promote PA and potentially allow targeting the best  
50 type of PA for each person, what might be called "Precision Exercise Prescription".

51 Evidence of genetic factors underlying the propensity to exercise in humans has been  
52 demonstrated in a number of studies<sup>7-14</sup>. Several studies have utilized a candidate gene approach to  
53 identify specific genetic variants associated with a proclivity towards PA<sup>8,15-19</sup>. This work generally  
54 focused on genes related to the serotonin and dopamine systems, energy metabolism, and neurotrophic  
55 factors. However, to our knowledge there have been only two previous reports of genome-wide  
56 association studies (GWAS) of PA<sup>20,21</sup>, neither of which identified a locus at genome-wide significance,  
57 likely due to relatively small sample sizes. Thus, while previous work strongly suggests a genetic basis  
58 for engagement in PA, the genes that contribute to this healthy lifestyle behavior remain unknown.

59 In this study, we conduct the largest GWAS of PA to date, aiming to identify genetic variants  
60 associated with self-reported and accelerometry-based levels of habitual, leisure-time PA. We sought to  
61 identify variants in the UK Biobank, a large cohort study of 500,000 adults measured across a wide range  
62 of characteristics including genome-wide markers. We then examined the genetic correlation of PA with  
63 other traits, examined putative tissues where PA genes may exert their effects, and meta-analyzed the  
64 identified loci for MVPA with data on self-reported PA in an independent cohort from the Atherosclerosis  
65 Risk in Communities (ARIC) study.

66

## 67 **Methods**

### 68 *Studies*

69 Data from the UK Biobank study were used for discovery of variants. Briefly, the UK Biobank is  
70 a large prospective cohort study of approximately a half-million adults (ages 40-69) living in the United  
71 Kingdom (UK), recruited from 22 centers across the UK <sup>22</sup>. All participants provided written informed  
72 consent. We also used data from the ARIC study, which is a prospective cohort study of over 15,000  
73 adults aged 45-64 years that took place in four United States communities. Details of the ARIC study can  
74 be found elsewhere <sup>23</sup>. To reduce the potential for confounding by population stratification, we included  
75 only individuals of white race/ethnicity in both studies.

76

### 77 *Physical activity*

78 In the UK Biobank, self-reported levels of physical activity during work and leisure time were  
79 measured via a touchscreen questionnaire, in a fashion similar to the International Physical Activity  
80 Questionnaire <sup>24</sup>. For moderate PA (MPA), participants were asked: “In a typical WEEK, on how many  
81 days did you do 10 minutes or more of moderate physical activities like carrying light loads, cycling at  
82 normal pace? (Do not include walking)”. For vigorous PA (VPA), participants were asked: “In a typical  
83 WEEK, how many days did you do 10 minutes or more of vigorous physical activity? (These are  
84 activities that make you sweat or breathe hard such as fast cycling, aerobics, heavy lifting)”. For each of  
85 these questions, those who indicated 1 or more such days were then asked “How many minutes did you  
86 usually spend doing moderate/vigorous activities on a typical DAY?”. Participants were asked to include  
87 activities performed for work, leisure, travel and around the house. We excluded individuals who selected  
88 “prefer not to answer” or “do not know” on the above questions, those reporting not being able to walk,  
89 and individuals reporting more than 16 hours of either MPA or VPA per day. Those reporting >3hr/day of  
90 VPA or MPA were recoded to 3 hours, as recommended <sup>25</sup>. Moderate-to-vigorous PA (MVPA) was

91 calculated by taking the sum of total minutes/week of MPA multiplied by four and the total number of  
92 VPA minutes/week multiplied by eight, corresponding to their metabolic equivalents, as previously  
93 described<sup>24,26</sup>.

94 Since heritability has previously been shown to be higher for intense/vigorous physical activity<sup>13</sup>,  
95 we also considered VPA on its own. Because the distribution of minutes/week of VPA was highly skewed  
96 and zero-inflated, we chose to dichotomize minutes/week of VPA into those who reported 0 days of VPA,  
97 and those reporting 3 or more days of VPA and also reporting a typical duration of VPA that is 25  
98 minutes or greater.

99 We used responses to the question “In the last 4 weeks did you spend any time doing the  
100 following?” and follow-up questions assessing the frequency and typical duration of “strenuous sports”  
101 and of “other exercises”. The possible responses to the initial question were: ‘walking for pleasure’,  
102 ‘other exercises’, ‘strenuous sports’, ‘light DIY’, ‘heavy DIY’, ‘none of the above’, and ‘prefer not to  
103 answer’. We identified individuals spending 2-3 days/week or more doing strenuous sports or other  
104 exercises (SSOE), for a duration of 15-30 minutes or greater. Controls were those individuals who did not  
105 indicate spending any time in the last 4 weeks doing either strenuous sports or other exercises.

106 Also, in the UK Biobank, approximately 100,000 participants wore an Axivity AX3 wrist-worn  
107 accelerometer, as previously described<sup>27</sup>. We examined two measures derived from up to seven days of  
108 accelerometer wear: overall acceleration average, and fraction of accelerations > 425 milli-gravities (mg)  
109<sup>27</sup>. Since the variable that is available in the UK Biobank is the fraction < 425 mg, we subtracted 1 from  
110 this variable. The 425 mg cutoff was chosen because this corresponds to an equivalent of vigorous  
111 physical activity, as previously reported<sup>28</sup>. For both accelerometry variables, we excluded individuals  
112 with less than three days (72 hours) of data, those not having data in each one-hour period of the 24-hour  
113 cycle, and outliers with values more than 4 standard deviations above the mean.

114 In ARIC, self-reported PA was assessed for sports/exercise, within the previous year, based on a  
115 modification of the Baecke questionnaire<sup>29,30</sup>. The sport/exercise index is based on responses to 4 items:  
116 frequency of participation in sports/exercise; frequency of sweating during sports/exercise; a subjective  
117 rating of the frequency of participation in sports/exercise compared to others in the same age group; the  
118 sum of frequency, duration, and intensity of up to 4 sports/exercises.

119

## 120 *Genotypes*

121 The majority of UK Biobank participants were genotyped with the Affymetrix UK Biobank  
122 Axiom Array (Santa Clara, CA, USA), while 10% of participants were genotyped with the Affymetrix  
123 UK BiLEVE Axiom Array. Detailed quality control and imputation procedures are described elsewhere  
124<sup>31</sup>. Imputation was performed using a combined panel of the Haplotype Reference Consortium<sup>32</sup> and the  
125 UK10K haplotype resource<sup>33</sup>. Since corrections for potential problems with the position assignment of  
126 the SNPs from the UK10K haplotype resource were not available at the time of analysis, we only  
127 included SNPs imputed from the Haplotype Reference Consortium. To minimize the possibility of  
128 confounding due to population stratification, only participants who self-identified as White/British  
129 (European-descent), and who were not population outliers based on principal components analysis (PCA)  
130 were included. Individuals were excluded based on unusually high heterozygosity or >5% missing rate, a  
131 mismatch between self-reported and genetically-inferred sex, and on relatedness (i.e. samples not used in  
132 primary PCA). SNP exclusions were made based on Hardy-Weinberg equilibrium ( $p < 1 \times 10^{-6}$ ), high  
133 missingness (>1.5%), low minor allele frequency (<0.1%), and low imputation quality (info < 0.4). A total  
134 of approximately 11.7 million SNPs were used in analyses.

135 In ARIC, participants were genotyped with the Affymetrix Genome-Wide Human SNP Array 6.0  
136 (Affymetrix, Santa Clara, CA, USA). Standard quality control procedures were implemented prior to  
137 imputation with IMPUTE2<sup>34</sup>, using all individuals in the 1,000 Genomes phase 1 integrated v3 release.

138 Quality-control procedures consisted of excluding SNPs with minor allele frequency < 1%, with  
139 missingness > 10%, and SNPs out of Hardy-Weinberg equilibrium ( $p < 1 \times 10^{-6}$ ), and excluding individuals  
140 with SNP missingness > 10%. We used principal components for the European-ancestry group as  
141 provided by ARIC in dbGaP. Briefly, LD pruning resulted in 71,702 SNPs that were used to derive  
142 principal components. A total sample size of 8,556 participants was used in the analysis.

143

#### 144 *Statistical analyses*

145 For the continuous variables in the UK Biobank (MVPA and accelerometry variables) we created  
146 an adjusted phenotype corresponding to the residual of the regression of the following independent  
147 variables on the respective dependent PA variable: age, sex, genotyping chip, first ten genomic principal  
148 components, center, season (month) at center visit or wearing accelerometer (coded 0 for Winter, 1 for  
149 Fall or Spring, and 2 for Summer). In sensitivity analyses, we considered the inclusion of the additional  
150 following covariates: levels of physical activity at work (coded as 0 by default, 1 for ‘sometimes’, 2 for  
151 ‘usually’, and 3 for ‘always’), extent of walking or standing at work (coded similarly as previous  
152 variable), and the Townsend Deprivation Index (TDI; a composite measure of deprivation as previously  
153 described<sup>35,36</sup>). We also considered a third model in which body mass index (BMI) was included as an  
154 additional covariate. Since the MVPA and fraction of accelerations > 425 mg variables exhibited skewed  
155 distributions, we inverse-normalized these variables prior to inclusion in the models. Model residuals  
156 conformed to the assumptions of normality and homoscedasticity. For the categorical variables, we used  
157 logistic regression, including the same set of covariates listed above. We also sought to identify variants  
158 consistently associated with PA across all five measures. We thus searched for variants associated in the  
159 same direction, with  $p < 0.001$  with each of the five PA phenotypes. The prior probability under the null  
160 hypothesis for a SNP association at this level with all four phenotypes and with the same direction of

161 association is  $0.005 \times 0.0025^4 = 1.95 \times 10^{-13}$ . However, it is important to note that these five phenotypes  
162 are correlated with each other.

163         Given the association that we identified with the rs428358 variant in *APOE* (see results below),  
164 we performed two additional analyses. First, we examined the associations with the *APOE*  $\epsilon 4$  genotype,  
165 using this SNP along with the rs7412 SNP. Individuals with homozygous CC genotypes at both of these  
166 SNPs were classified as homozygous for the *APOE*  $\epsilon 4$  allele. Individuals with homozygous CC genotypes  
167 at either SNP and heterozygous at the other SNP were classified as being heterozygous for the  $\epsilon 4$  allele.  
168 We excluded individuals heterozygous at both SNPs. We assumed an additive model in association  
169 testing. Second, to examine whether this association may be driven by individuals with a known family  
170 history of Alzheimer's disease increasing their levels of PA, we examined the association of a binary  
171 variable indicating any self-reported first-degree family history (mother, father, or siblings) of  
172 Alzheimer's disease or dementia with MVPA.

173         All genome-wide significant loci for MVPA were examined in ARIC, where we modeled PA as a  
174 continuous variable (as described above). We used multiple linear regression to model PA as a function  
175 of: age, sex, first ten genomic principal components, BMI, center, season (coded in the same way as  
176 described above). Residuals from this model conformed to the assumptions of normality and  
177 homoscedasticity. They were standardized to have a mean of 0 and standard deviation of 1, and were used  
178 as the outcome in the genome-wide SNP association analysis. We performed meta-analysis of the top hits  
179 for MVPA in the UK Biobank with the corresponding SNP association results in ARIC, using fixed-  
180 effects inverse-variance weighted meta-analysis. All GWAS analyses were performed with PLINK 2.0,  
181 assuming an additive genetic model<sup>37</sup>. Additional analyses were performed with R statistical software<sup>38</sup>.  
182 To examine association of genetic variants with gene expression patterns in different tissues, we used the  
183 web-based platform, Functional Mapping and Annotation of Genome-Wide Association Studies (FUMA  
184 GWAS)<sup>39</sup>, which uses data from GTEx<sup>40</sup>.



185 We used the summary statistics from our GWAS to examine genetic correlation of PA with over  
186 200 traits and diseases using LD score regression<sup>41,42</sup>, implemented in an online interface  
187 (<http://ldsc.broadinstitute.org/>). The genetics of these other traits and diseases are inferred from  
188 previously published GWAS. A significant genetic correlation was considered to have a  $p < 2.5 \times 10^{-4}$ ,  
189 assuming a correction for 200 different tests, which is conservative given that many of the traits/diseases  
190 tested are correlated with each other. LD score regression intercepts and chip heritability estimates were  
191 also recorded.

192

## 193 **Results**

### 194 *Self-reported PA in UK Biobank*

195 A summary of self-report PA variables can be found in Table 1. BMI and TDI were consistently  
196 negatively associated with these variables, whereas warmer season and male gender were consistently  
197 positively associated with them (see Supplementary Table 1). Physical activity at work was positively  
198 associated with MVPA and VPA, and negatively associated with SSOE. Self-report PA measures were  
199 weakly correlated with accelerometry-based measures (see Supplementary Table 2). ‘Chip heritability’  
200 estimates for self-report PA measures were approximately 5-6% (Supplementary Table 3). LD score  
201 regression intercepts ( $< 1.02$ ) suggest no significant systematic inflation of test statistics. In over 277,000  
202 individuals, we found ten loci significantly associated ( $p < 5 \times 10^{-8}$ ) with MVPA and four loci with VPA  
203 (see Figure 1 and Table 2). Most notably, the C allele at SNP rs429358 in *APOE* is associated with higher  
204 self-reported MVPA. This allele is also nominally associated with higher levels of other PA measures  
205 (VPA:  $p = 8.4 \times 10^{-6}$ ; SSOE:  $p = 0.049$ ; average acceleration:  $p = 3.7 \times 10^{-3}$ ). Testing the association of the  
206 Alzheimer’s disease-related *APOE*  $\epsilon 4$  allele with MVPA resulted in nearly identical findings. In models  
207 adjusted for other covariates, this *APOE* variant remained genome-wide significant (see Supplementary  
208 Tables 4 and 5). There were 33,337 individuals reporting any family history of Alzheimer’s disease or

209 dementia among parents and siblings. These individuals reported lower levels of MVPA ( $p=1.2 \times 10^{-4}$ ).  
210 An intronic variant in *CADM2* was associated with SSOE (see Table 2). A variant at the same locus was  
211 also associated with VPA in the model including all covariates (see Suppl. Table 5). Variants in and near  
212 *MMS22L* were identified with VPA and SSOE, respectively. Upon meta-analysis of the 10 top hits for  
213 MVPA with the results in ARIC, 8 were genome-wide significant ( $p < 5 \times 10^{-8}$ ), including the *APOE*  
214 variant (see Table 3). In models adjusting for additional covariates (PA at work, TDI, BMI), the results  
215 were similar, but with fewer loci reaching genome-wide significance (see Supplementary Tables 4 and 5  
216 and Supplementary Figures 1 and 2). Notably, the *APOE* and *CADM2* loci remained significant after  
217 adjustment for other covariates.

218

#### 219 *Accelerometer-based PA in UK Biobank*

220 ‘Chip heritability’ estimates for the accelerometry-based measures were higher (15% for average  
221 acceleration, and 11% for fraction of accelerations  $>425$  mg) than for self-report PA measures  
222 (Supplementary Table 3). LD score regression intercepts ( $<1.009$ ) suggest no significant systematic  
223 inflation of test statistics. Three loci were found to be significantly associated with average acceleration  
224 and one locus with fraction of accelerations  $>425$  mg (see Table 2 and Figure 1). In models adjusted for  
225 other covariates, only the *MAPT\_ASI* locus remained consistently genome-wide significant (see  
226 Supplementary Tables 4 and 5 and Supplementary Figures 1 and 2).

227 We found thirteen loci associated with each of the five PA measures at  $p < 0.005$ , and with the  
228 same direction of association (Table 4). These include an intronic variant in *DNAJCI*, a variant just  
229 upstream of *DCAF5*, and a missense variant in *PML*.

230

#### 231 *Genetic correlation and tissue enrichment analysis*

232 We examined the genetic correlation between habitual PA and over 200 other traits/diseases. We  
233 found highly significant negative genetic correlations of MVPA and VPA with intelligence (see Figure 2).  
234 We also found significant positive genetic correlations with early-morning chronotype and schizophrenia.  
235 Interestingly, however, we found a positive correlation of SSOE with years of schooling and intelligence,  
236 as well as with age at first birth and bipolar disorder. SSOE was negatively genetically correlated with  
237 depressive symptoms, neuroticism, body fat, waist circumference, and insomnia (see Figure 2). Among  
238 the accelerometry-based variables, we found highly significant negative genetic correlations of PA with  
239 waist and hip circumference, body fat, obesity, BMI, and triglycerides (see Figure 2). Genetic correlation  
240 results remained very similar with GWAS models including activity at work and TDI as covariates (see  
241 Supplementary Figure 3), except for generally attenuated correlations with intelligence in the model with  
242 all covariates except BMI. Upon addition of BMI as a covariate, the direction of genetic correlation  
243 between PA and obesity traits was reversed (see Supplementary Figure 4). As we note below, caution  
244 may be warranted in interpreting results from these adjusted models. In ARIC, we found similar genetic  
245 correlations of PA with waist circumference ( $r_g=-0.13$ ), chronotype ( $r_g=0.04$ ), years of schooling  
246 ( $r_g=0.16$ ), and schizophrenia ( $r_g=0.32$ ), although these do not reach statistical significance.

247 Tissue enrichment analysis using eQTL data from GTEx implicate the brain and pituitary gland  
248 as primary tissues through which the PA-associated loci may exert their effects (see Figure 3 and  
249 Supplementary Figures 5 and 6).

250

## 251 **Discussion**

252 Given the importance of PA for many dimensions of health, and its' reported heritability, we  
253 sought to identify genetic variants that are associated with engagement in habitual physical activity, while  
254 considering important covariates such as season, physical activity at work, socio-economic status, and  
255 BMI.

256 In the UK Biobank, with a very large sample size and multiple measures of PA, we identified  
257 over 25 genome-wide significant SNPs. Although most were novel, some had previous links to disease or  
258 other traits. Among these, the variant in *CADM2*, a gene which encodes cell adhesion molecule 2, and is  
259 primarily expressed in the brain, has recently been linked to risk-taking behavior and other personality  
260 traits<sup>43-45</sup>, as well as with information processing speed<sup>46</sup>. The A allele at rs1376935 that we found to be  
261 associated with higher SSOE, is in LD in the European population with the G allele at the rs13084531  
262 SNP which was found to be associated with risk-taking behavior<sup>45</sup>. It thus appears that this locus may be  
263 important for several personality, cognitive, and behavioral traits, and may potentially be involved in  
264 reward systems. Additionally, it is important to note that this locus was significant for SSOE but not for  
265 the other traits. It may thus be specifically implicated in the proclivity to engage in intentional high-  
266 intensity exercise and sport, as opposed to more general and/or lower intensity PA.

267 Interestingly, a well-established variant in *APOE* (part of *APOE*  $\epsilon 4$  allele), strongly implicated in  
268 Alzheimer's disease<sup>47,48</sup>, exhibited one of the strongest associations with PA, and remained significant  
269 upon meta-analysis. How the *APOE* risk allele is associated with greater PA is not clear. An exercise  
270 training study found that *APOE*  $\epsilon 4$  carriers had a greater increase in aerobic capacity<sup>49</sup>. This increased  
271 responsiveness to PA could reinforce engagement in PA or be related to other factors that influence the  
272 tendency to engage in PA. Although another potential explanation for our finding is that individuals with  
273 a known family history of dementia or Alzheimer's disease purposefully increase their levels of PA in the  
274 hope of reducing risk for developing the disease, our findings do not suggest that individuals with a first-  
275 degree family history of Alzheimer's disease or dementia engage in higher levels of PA. It is important to  
276 note that the association between *APOE* and PA may lead to spurious gene-environment interactions<sup>50</sup>,  
277 and thus further work is needed to clarify this observed association. Additionally, although the association  
278 remained after adjustment for BMI and other covariates, it remains to be determined whether some  
279 residual confounding might exist. Finally, it is important to note that none of the identified loci have  
280 previously been found to be associated with PA or related traits<sup>16,17</sup>.

281 Previous studies have shown that BMI-associated genetic variants are also associated with PA  
282 <sup>51,52</sup>. Similarly, we found an overall shared genetic basis for PA (especially accelerometer-based  
283 measures) with several obesity-related traits, suggesting that genetic risk for obesity coincides with  
284 genetic propensity for lower PA. There is likely a complex set of genetic, environmental, and phenotypic  
285 factors that connect PA and obesity across the lifespan, that involve many pleiotropic genetic factors.  
286 Although the direction of correlation is reversed when BMI is included as a covariate, caution is  
287 warranted in interpreting results of genetic associations in which heritable covariates are included in the  
288 association model <sup>53</sup>. Another major potential source of bias is collider bias, which occurs when one  
289 controls for a variable (i.e. BMI) that is caused by both another covariate (i.e. gene) and the outcome  
290 variable in the model (i.e. PA) <sup>54,55</sup>.

291 Our study is strengthened by the large sample size, the availability of both self-reported and  
292 objective accelerometer-based measures of PA, and the availability of a replication cohort from a  
293 different country. However, we note several limitations. Given the relatively small genetic effect sizes  
294 observed for these PA phenotypes, we were insufficiently powered to formally replicate associations in  
295 the much smaller sample size in ARIC. Additional replication studies are thus needed to more robustly  
296 identify PA-associated loci. Furthermore, the self-report measures of PA used in ARIC differed from the  
297 one used in the UK Biobank. Both self-reported and accelerometer-based measures of PA are subject to  
298 various biases. Since both the UK Biobank and ARIC cohorts are comprised of middle- to late-middle-  
299 aged adults, the extent to which these results generalize to other age groups is not known. Furthermore,  
300 our results may not generalize to other ethnic/racial groups.

301 In conclusion, our study revealed several important new findings. Effect sizes were generally  
302 very small, given the very large sample size, the common variants identified, and the modest p-values.  
303 We identified over 20 variants, most of which were novel, and thus need further study. We identified a  
304 variant in *CADM2*, a gene previously been found to be associated with personality traits. We also  
305 identified a well-established major risk variant for Alzheimer's disease in *APOE*, which was associated

306 with higher levels of PA, suggesting the need for follow up studies to help clarify the nature of this  
307 observed association and its implication for understanding gene-environment interactions related to PA.  
308 We found genetic correlation of PA with obesity <sup>56,57</sup>, psychiatric <sup>58,59</sup>, educational <sup>60</sup>, chronotype <sup>61</sup>, and  
309 other traits. Genetic correlations with obesity may indicate extensive pleiotropy involving genes  
310 associated with both PA and obesity. The identification of genetic factors that predispose to high or low  
311 levels of PA will lead to a better understanding of the biological mechanisms underlying these  
312 proclivities. It may also lead to the identification of individuals less likely to engage in and/or adhere to  
313 PA, and consequently to the development of tailored behavioral strategies. Finally, the integration of  
314 genetic characteristics with lifestyle and environmental information may point to how  
315 lifestyle/environmental factors interact with genetic factors to influence levels of PA.

316

## 317 **Acknowledgments**

318 This research was conducted using the UK Biobank Resource under Application Number 15678.  
319 We thank the participants and organizers of the UK Biobank. We also thank the participants and  
320 organizers of the ARIC study. Data from ARIC was obtained from dbGaP through accession number  
321 phs000280.v2.p1. The authors would like to acknowledge support from the National Institute of Diabetes  
322 and Digestive and Kidney Diseases grant (K01DK095032), the National Institute on Aging (AG019610),  
323 the State of Arizona and Arizona Department of Health Services (ADHS), and the McKnight Brain  
324 Research Foundation. The funders had no role in study design, data collection and analysis, decision to  
325 publish, or preparation of the manuscript.

326

327 Atherosclerosis Risk in Communities

328 The Atherosclerosis Risk in Communities Study is carried out as a collaborative study supported by  
329 National Heart, Lung, and Blood Institute contracts (HHSN268201100005C, HHSN268201100006C,  
330 HHSN268201100007C, HHSN268201100008C, HHSN268201100009C, HHSN268201100010C,  
331 HHSN268201100011C, and HHSN268201100012C). Funding for GENEVA was provided by National  
332 Human Genome Research Institute grant U01HG004402 (E. Boerwinkle). The authors thank the staff and  
333 participants of the ARIC study for their important contributions.

#### 334 LDHUB Acknowledgements

335 We gratefully acknowledge all the studies and databases that made GWAS summary data available:  
336 ADIPOGen (Adiponectin genetics consortium), C4D (Coronary Artery Disease Genetics Consortium),  
337 CARDIoGRAM (Coronary ARtery DIsease Genome wide Replication and Meta-analysis), CKDGen  
338 (Chronic Kidney Disease Genetics consortium), dbGAP (database of Genotypes and Phenotypes),  
339 DIAGRAM (DIAbetes Genetics Replication And Meta-analysis), ENIGMA (Enhancing Neuro Imaging  
340 Genetics through Meta Analysis), EAGLE (EARly Genetics & Lifecourse Epidemiology Eczema  
341 Consortium, excluding 23andMe), EGG (Early Growth Genetics Consortium), GABRIEL (A  
342 Multidisciplinary Study to Identify the Genetic and Environmental Causes of Asthma in the European  
343 Community), GCAN (Genetic Consortium for Anorexia Nervosa), GEFOS (GENetic Factors for  
344 OSteoporosis Consortium), GIANT (Genetic Investigation of ANthropometric Traits), GIS (Genetics of  
345 Iron Status consortium), GLGC (Global Lipids Genetics Consortium), GPC (Genetics of Personality  
346 Consortium), GUGC (Global Urate and Gout consortium), HaemGen (haematological and platelet traits  
347 genetics consortium), HRgene (Heart Rate consortium), IIBDGC (International Inflammatory Bowel  
348 Disease Genetics Consortium), ILCCO (International Lung Cancer Consortium), IMSGC (International  
349 Multiple Sclerosis Genetic Consortium), MAGIC (Meta-Analyses of Glucose and Insulin-related traits  
350 Consortium), MESA (Multi-Ethnic Study of Atherosclerosis), PGC (Psychiatric Genomics Consortium),  
351 Project MinE consortium, ReproGen (Reproductive Genetics Consortium), SSGAC (Social Science  
352 Genetics Association Consortium) and TAG (Tobacco and Genetics Consortium), TRICL

353 (Transdisciplinary Research in Cancer of the Lung consortium), UK Biobank. We gratefully acknowledge  
354 the contributions of Alkes Price (the systemic lupus erythematosus GWAS and primary biliary cirrhosis  
355 GWAS) and Johannes Kettunen (lipids metabolites GWAS).

356



## 357 **References**

- 358 1. Fiuzza-Luces C, Garatachea N, Berger NA, Lucia A. Exercise is the real polypill. *Physiol.* 2013;
- 359 2. US Surgeon General. Physical Activity and Health: A Report of the Surgeon General. S/N 017-  
360 023-00196-5. 1996.
- 361 3. Blair SN. Physical inactivity: the biggest public health problem of the 21st century. *Br J Sports*  
362 *Med* [Internet]. 2009 Jan 9;1 LP – 2. 43.
- 363 4. Kaplan GA, Strawbridge WJ, Cohen RD, Hungerford LR. Natural history of leisure-time physical  
364 activity and its correlates: associations with mortality from all causes and cardiovascular disease  
365 over 28 years. *Am J Epidemiol.* 1996;
- 366 5. Bauman AE, Reis RS, Sallis JF, Wells JC, Loos RJF, Martin BW. Correlates of physical activity:  
367 Why are some people physically active and others not? *Lancet.* 2012. p. 258–71.
- 368 6. Trost SG, Owen N, Bauman AE, Sallis JF, Brown W. Correlates of adults' participation in  
369 physical activity: review and update. *Med Sci Sport Exerc.* 2002;
- 370 7. den Hoed M, Brage S, Zhao JH, Westgate K, Nessa A, Ekelund U, et al. Heritability of objectively  
371 assessed daily physical activity and sedentary behavior. *Am. J. Clin. Nutr.* 2013. p. 1317–25.
- 372 8. Gielen M, Westerterp-Plantenga MS, Bouwman FG, Joosen AMCP, Vlietinck R, Derom C, et al.  
373 Heritability and genetic etiology of habitual physical activity: a twin study with objective  
374 measures. [Internet]. *Genes Nutr.* 2014. p. 415.
- 375 9. Stubbe JH, Boomsma DI, Vink JM, Cornes BK, Martin NG, Skytthe A, et al. Genetic influences  
376 on exercise participation in 37,051 twin pairs from seven countries. *PLoS One.* 2006.
- 377 10. Silventoinen K, Sammalisto S, Perola M, Boomsma DI, Cornes BK, Davis C, et al. Heritability of  
378 adult body height: a comparative study of twin cohorts in eight countries. *Twin Res* [Internet].

- 379 2003 Oct;399–408. 6.
- 380 11. Joosen AMCP, Gielen M, Vlietinck R, Westerterp KR. Genetic analysis of physical activity in  
381 twins. *Am J Clin Nutr.* 2005 Dec;1253–9. 82.
- 382 12. Pérusse L, Tremblay A, Leblanc C, Bouchard C. Genetic and environmental influences on level of  
383 habitual physical activity and exercise participation. *Am J Epidemiol.* 1989;
- 384 13. Lauderdale DS, Fabsitz R, Meyer JM, Sholinsky P, Ramakrishnan V, Goldberg J. Familial  
385 determinants of moderate and intense physical activity: a twin study. *Med Sci Sports Exerc.* 1997  
386 Aug;1062–8. 29.
- 387 14. Kaprio J, Koskenvuo M, Sarna S. Cigarette smoking, use of alcohol, and leisure-time physical  
388 activity among same-sexed adult male twins. *Prog Clin Biol Res.* 1981;37–46. 69 Pt C.
- 389 15. Thompson PD, Tsongalis GJ, Ordovas JM, Seip RL, Bilbie C, Miles M, et al. Angiotensin-  
390 converting enzyme genotype and adherence to aerobic exercise training. *Prev Cardiol.* 2006;
- 391 16. Herring MP, Sailors MH, Bray MS. Genetic factors in exercise adoption, adherence and obesity.  
392 *Obes Rev.* 2014 Jan;29–39. 15.
- 393 17. Wilkinson A V., Gabriel KP, Wang J, Bondy ML, Dong Q, Wu X, et al. Sensation-seeking genes  
394 and physical activity in youth. *Genes, Brain Behav.* 2013;
- 395 18. Caldwell Hooper AE, Bryan AD, Hagger MS. What keeps a body moving? The brain-derived  
396 neurotrophic factor val66met polymorphism and intrinsic motivation to exercise in humans. *J*  
397 *Behav Med.* 2014 Dec;1180–92. 37.
- 398 19. Lightfoot JT. Current understanding of the genetic basis for physical activity. *J Nutr.* 2011  
399 Mar;526–30. 141.
- 400 20. De Moor MHM, Liu Y-J, Boomsma DI, Li J, Hamilton JJ, Hottenga J-J, et al. Genome-wide

- 401 association study of exercise behavior in Dutch and American adults. *Med Sci Sports Exerc.* 2009  
402 Oct;1887–95. 41.
- 403 21. Kim J, Oh S, Min H, Kim Y, Park T. Practical issues in genome-wide association studies for  
404 physical activity. *Ann N Y Acad Sci.* 2011 Jul;38–44. 1229.
- 405 22. Sudlow C, Gallacher J, Allen N, Beral V, Burton P, Danesh J, et al. UK Biobank: An Open Access  
406 Resource for Identifying the Causes of a Wide Range of Complex Diseases of Middle and Old  
407 Age. *PLoS Med.* 2015; 12.
- 408 23. The Aric Investigators. The Atherosclerosis Risk in Communities (ARIC) Study: design and  
409 objectives. The ARIC investigators. *Am J Epidemiol [Internet].* 1989;687–702. 129.
- 410 24. Craig CL, Marshall AL, Sjöström M, Bauman AE, Booth ML, Ainsworth BE, et al. International  
411 physical activity questionnaire: 12-country reliability and validity. *Med Sci Sports Exerc*  
412 *[Internet].* 2003 Aug;1381–95. 35.
- 413 25. Ipaq, Sci M, Med S, Hardcastle S, Blake N, Hagger MS, et al. Guidelines for Data Processing and  
414 Analysis of the International Physical Activity Questionnaire ( IPAQ ) - Short Form. *J Am Diet*  
415 *Assoc.* 2002;
- 416 26. Ekelund U, Sepp H, Brage S, Becker W, Jakes R, Hennings M, et al. Criterion-related validity of  
417 the last 7-day, short form of the International Physical Activity Questionnaire in Swedish adults.  
418 *Public Health Nutr.* 2006;
- 419 27. Doherty A, Jackson D, Hammerla N, Plötz T, Olivier P, Granat MH, et al. Large Scale Population  
420 Assessment of Physical Activity Using Wrist Worn Accelerometers: The UK Biobank Study.  
421 Buchowski M, editor. *PLoS One [Internet].* 2017 Feb 1;e0169649. 12.
- 422 28. Hildebrand M, Van Hees VT, Hansen BH, Ekelund U. Age group comparability of raw

- 423 accelerometer output from wrist-and hip-worn monitors. *Med Sci Sports Exerc.* 2014;
- 424 29. Baecke JA, Burema J, Frijters JE. A short questionnaire for the measurement of habitual physical  
425 activity in epidemiological studies. *Am J Clin Nutr.* 1982;936–42. 36.
- 426 30. Folsom AR, Arnett DK, Hutchinson RG, Liao F, Clegg LX, Cooper LS. Physical activity and  
427 incidence of coronary heart disease in middle-aged women and men. *Med Sci Sport Exerc.*  
428 1997;901–9. 29.
- 429 31. Bycroft C, Freeman C, Petkova D, Band G, Elliott LT, Sharp K, et al. Genome-wide genetic data  
430 on ~500,000 UK Biobank participants. *bioRxiv [Internet].* 2017 Jul 20;
- 431 32. McCarthy S, Das S, Kretzschmar W, Delaneau O, Wood AR, Teumer A, et al. A reference panel  
432 of 64,976 haplotypes for genotype imputation. *Nat Genet.* 2016;
- 433 33. UK10K Consortium. The UK10K project identifies rare variants in health and disease. *Nature.*  
434 2015.
- 435 34. Howie B, Marchini J, Stephens M, Chakravarti A. Genotype Imputation with Thousands of  
436 Genomes. *G3 GenesGenomesGenetics [Internet].* 2011;457–70. 1.
- 437 35. Townsend P. Deprivation. *J Soc Policy [Internet].* 2009/01/01 ed. 1987;125–46. 16.
- 438 36. Smith GD, Whitley E, Dorling D, Gunnell D. Area based measures of social and economic  
439 circumstances: cause specific mortality patterns depend on the choice of index. *J Epidemiol*  
440 *Community Health.* 2001;
- 441 37. Chang CC, Chow CC, Tellier LC, Vattikuti S, Purcell SM, Lee JJ. Second-generation PLINK:  
442 rising to the challenge of larger and richer datasets. *Gigascience [Internet].* 2015 Feb 25;7. 4.
- 443 38. Team RDC. R: A language and environment for statistical computing. 2011.

- 444 39. Watanabe K, Taskesen E, van Bochoven A, Posthuma D. FUMA: Functional mapping and  
445 annotation of genetic associations. *bioRxiv*. 2017 Feb;
- 446 40. Consortium TGte. The Genotype-Tissue Expression (GTEx) pilot analysis: Multitissue gene  
447 regulation in humans. *Sci [Internet]*. 2015 May 8;648–60. 348 .
- 448 41. Zheng J, Erzurumluoglu AM, Elsworth BL, Kemp JP, Howe L, Haycock PC, et al. LD Hub: a  
449 centralized database and web interface to perform LD score regression that maximizes the  
450 potential of summary level GWAS data for SNP heritability and genetic correlation analysis.  
451 *Bioinformatics [Internet]*. 2017;272. 33.
- 452 42. Bulik-Sullivan B, Finucane HK, Anttila V, Gusev A, Day FR, Consortium R, et al. An Atlas of  
453 Genetic Correlations across Human Diseases and Traits. *bioRxiv*. 2015;
- 454 43. Boutwell B, Hinds D, Tielbeek J, Ong KK, Day FR, Perry JRB. Replication and characterization  
455 of CADM2 and MSRA genes on human behavior. *Heliyon*. 2017 Jul;e00349. 3.
- 456 44. Day FR, Helgason H, Chasman DI, Rose LM, Loh P-R, Scott RA, et al. Physical and  
457 neurobehavioral determinants of reproductive onset and success. *Nat Genet [Internet]*. 2016  
458 Jun;617–23. 48.
- 459 45. Strawbridge RJ, Ward J, Cullen B, Tunbridge EM, Hartz S, Bierut L, et al. Genome-wide analysis  
460 of risk-taking behaviour and cross-disorder genetic correlations in 116,255 individuals from the  
461 UK Biobank cohort. *bioRxiv [Internet]*. 2017 Aug 16;
- 462 46. Ibrahim-Verbaas CA, Bressler J, Dobbins S, Schuur M, Smith A V, Bis JC, et al. GWAS for  
463 executive function and processing speed suggests involvement of the CADM2 gene [Internet].  
464 *Mol Psychiatry*. 2016. p. 189–97.
- 465 47. Pericak-Vance MA, Bebout JL, Gaskell Jr. PC, Yamaoka LH, Hung WY, Alberts MJ, et al.

- 466 Linkage studies in familial Alzheimer disease: evidence for chromosome 19 linkage.  
467 *AmJHumGenet.* 1991;
- 468 48. Saunders AM, Strittmatter WJ, Schmechel D, St. George-Hyslop PH, Pericak-Vance MA, Joo SH,  
469 et al. Association of apolipoprotein E allele  $\epsilon$ 4 with late-onset familial and sporadic alzheimer's  
470 disease. *Neurology.* 1993;
- 471 49. Thompson PD, Tsongalis GJ, Seip RL, Bilbie C, Miles M, Zoeller R, et al. Apolipoprotein e  
472 genotype and changes in serum lipids and maximal oxygen uptake with exercise training.  
473 *Metabolism [Internet].* 2004 Feb;193–202. 53.
- 474 50. Dudbridge F, Fletcher O. Gene-environment dependence creates spurious gene-environment  
475 interaction. *Am J Hum Genet.* 2014 Sep;301–7. 95.
- 476 51. Lee H, Ash GI, Angelopoulos TJ, Gordon PM, Moyna NM, Visich PS, et al. Obesity-Related  
477 Genetic Variants and their Associations with Physical Activity [Internet]. *Sport. Med Open.* 2015.  
478 p. 34.
- 479 52. Richmond RC, Davey Smith G, Ness AR, den Hoed M, McMahon G, Timpson NJ. Assessing  
480 Causality in the Association between Child Adiposity and Physical Activity Levels: A Mendelian  
481 Randomization Analysis. *PLoS Med.* 2014.
- 482 53. Aschard H, Vilhjalmsson BJ, Joshi AD, Price AL, Kraft P. Adjusting for heritable covariates can  
483 bias effect estimates in genome-wide association studies. *Am J Hum Genet.* 2015 Feb;329–39. 96.
- 484 54. Day FR, Loh P-R, Scott RA, Ong KK, Perry JR. A Robust Example of Collider Bias in a Genetic  
485 Association Study. *Am J Hum Genet [Internet].* 2016 Feb 4;392–3. 98.
- 486 55. Yaghootkar H, Bancks MP, Jones SE, McDaid A, Beaumont R, Donnelly L, et al. Quantifying the  
487 extent to which index event biases influence large genetic association studies. *Hum Mol Genet.*

- 488            2017 Mar;1018–30. 26.
- 489    56.    Shungin D, Winkler T, Croteau-Chonka D, Ferreira T, Mägi R, Lakka T, et al. New genetic loci  
490            link adipose and insulin biology to body fat distribution. *Nature*. 2015;187–96. 518.
- 491    57.    Locke AE, Kahali B, Berndt SI, Justice AE, Pers TH, Day FR, et al. Genetic studies of body mass  
492            index yield new insights for obesity biology. *Nature* [Internet]. 2015 Feb 12;197–206. 518.
- 493    58.    Large-scale genome-wide association analysis of bipolar disorder identifies a new susceptibility  
494            locus near ODZ4. *Nat Genet*. 2011 Sep;977–83. 43.
- 495    59.    Biological insights from 108 schizophrenia-associated genetic loci. *Nature*. 2014 Jul;421–7. 511.
- 496    60.    Sniekers S, Stringer S, Watanabe K, Jansen PR, Coleman JRI, Krapohl E, et al. Genome-wide  
497            association meta-analysis of 78,308 individuals identifies new loci and genes influencing human  
498            intelligence. *Nat Genet*. 2017 Jul;1107–12. 49.
- 499    61.    Jones SE, Tyrrell J, Wood AR, Beaumont RN, Ruth KS, Tuke MA, et al. Genome-Wide  
500            Association Analyses in 128,266 Individuals Identifies New Morningness and Sleep Duration  
501            Loci. *PLoS Genet*. 2016 Aug:e1006125. 12.
- 502
- 503

504 **Figure Legends**

505 **Figure 1:** Manhattan plot of GWAS for self-reported MVPA and VPA, strenuous sports or other  
506 exercises (abbreviated as SS or Other Exer.), and for accelerometer-based average accelerations and  
507 fraction of accelerations > 425 mg. Negative log<sub>10</sub>-transformed p-value for each SNP is plotted by  
508 chromosome and position (x-axis). The red and blue horizontal lines represent thresholds for genome-  
509 wide significant and suggestive associations, respectively.

510

511 **Figure 2:** Genetic correlation of PA variables with other traits and diseases. Traits/diseases are ordered  
512 from top to bottom in order of increasing p-value for the ten traits/diseases with strongest degree  
513 (according to p-value) of genetic correlation with respective measure of PA. Horizontal position of bars  
514 corresponds to the genetic correlation ( $r_g$ ) between PA and the respective trait/disease. Error bars  
515 represent 95% confidence intervals for  $r_g$  estimates. Bright green bars represent traits that showed a  
516 correlation with p-value <2.5E-4, and light green bars represent traits with genetic correlation p<0.05. We  
517 excluded highly redundant traits (e.g. obesity, overweight) after leaving higher ranked one in.

518

519 **Figure 3:** Results of tissue enrichment analysis using eQTL results from GTEx RNA-seq data for PA-  
520 associated loci. Dashed line represents the Bonferroni-corrected significance threshold.

521



522 **Table 1: Summary of PA phenotypes in the UK Biobank**

---

**Self-Report**

---

|                                  |                                 |
|----------------------------------|---------------------------------|
| MVPA                             | Mean=1,646; SD=2,075; n=277,656 |
| VPA: $\geq 3$ vs. 0 days/week    | 71,739 cases; 119,866 controls  |
| SSOE: $\geq 2-3$ vs. 0 days/week | 91,785 cases; 165,381 controls  |

---

**Accelerometry**

---

|                                                 |                                    |
|-------------------------------------------------|------------------------------------|
| Average acceleration (milli-gravities)          | Mean=27.93; SD=8.15; n=67,808      |
| Fraction of accelerations > 425 milli-gravities | Mean=0.0026 ; SD=0.0033 ; n=67,565 |

---

523 SD: standard deviation

524

525

526 **Table 2:** Summary of polymorphisms identified in the UK Biobank.

| SNP ID                                                                 | Chr. | Gene/Nearest Gene   | Position    | EA | EAF   | Beta/OR | p-value  | n       |
|------------------------------------------------------------------------|------|---------------------|-------------|----|-------|---------|----------|---------|
| <i>MVPA</i>                                                            |      |                     |             |    |       |         |          |         |
| rs429358                                                               | 19   | <i>APOE</i>         | 45,411,941  | T  | 0.840 | -0.024  | 4.98E-11 | 277,656 |
| rs72737787                                                             | 9    | <i>ZCCHC7</i>       | 37,336,741  | G  | 0.650 | -0.018  | 3.66E-10 | 277,656 |
| rs1043595                                                              | 7    | <i>CALU</i>         | 128,410,012 | G  | 0.720 | 0.018   | 1.48E-09 | 277,656 |
| rs1921981                                                              | 21   | <i>BACE2</i>        | 42,422,547  | G  | 0.670 | 0.017   | 4.03E-09 | 277,656 |
| rs3129981                                                              | 6    | <i>HCG20</i>        | 30,758,857  | C  | 0.830 | 0.021   | 5.13E-09 | 277,656 |
| rs921917                                                               | 7    | <i>C7orf72</i>      | 50,228,738  | C  | 0.510 | -0.016  | 1.19E-08 | 277,656 |
| rs12147808                                                             | 14   | <i>C14orf64</i>     | 98,618,705  | C  | 0.790 | -0.019  | 1.30E-08 | 277,656 |
| rs124672                                                               | 8    | <i>KCNK9</i>        | 140,722,178 | A  | 0.710 | -0.017  | 2.22E-08 | 277,656 |
| rs148854222                                                            | 5    | <i>SLC1A3</i>       | 36,505,944  | T  | 0.997 | -0.143  | 2.87E-08 | 277,656 |
| rs12142550                                                             | 1    | <i>HAX1</i>         | 154,258,549 | C  | 0.750 | 0.017   | 4.60E-08 | 277,656 |
| <i>Vigorous PA: ≥ 3 vs. 0 days/week</i>                                |      |                     |             |    |       |         |          |         |
| rs6955240                                                              | 7    | <i>EXOC4</i>        | 133,581,873 | G  | 0.610 | 1.044   | 9.57E-10 | 191,473 |
| rs3781411                                                              | 10   | <i>CTBP2</i>        | 126,715,436 | C  | 0.880 | 1.063   | 4.88E-09 | 191,473 |
| rs6667222                                                              | 1    | <i>HAX1</i>         | 154,253,661 | A  | 0.750 | 1.046   | 9.55E-09 | 191,473 |
| rs6909774                                                              | 6    | <i>MMS22L</i>       | 97,687,471  | A  | 0.250 | 1.044   | 3.34E-08 | 191,473 |
| <i>Strenuous sports or other exercises: ≥ 2-3 vs. 0 days/week</i>      |      |                     |             |    |       |         |          |         |
| rs1376935                                                              | 3    | <i>CADM2</i>        | 85,236,425  | G  | 0.690 | 0.955   | 1.28E-12 | 256,850 |
| rs10946808                                                             | 6    | <i>HIST1H1D</i>     | 26,233,387  | A  | 0.730 | 0.962   | 3.10E-09 | 256,850 |
| rs1638525                                                              | 17   | <i>AKAP10</i>       | 19,848,594  | G  | 0.600 | 1.035   | 7.90E-09 | 256,850 |
| rs35622985                                                             | 6    | <i>MMS22L</i>       | 97,783,799  | G  | 0.680 | 0.964   | 8.81E-09 | 256,850 |
| rs705692                                                               | 1    | <i>CAMTA1</i>       | 7,480,217   | C  | 0.110 | 0.947   | 1.53E-08 | 256,850 |
| rs1959759                                                              | 14   | <i>DCAF5</i>        | 69,632,877  | A  | 0.360 | 1.035   | 1.62E-08 | 256,850 |
| rs4411372                                                              | 13   | <i>STK24</i>        | 99,130,423  | T  | 0.720 | 0.964   | 2.36E-08 | 256,850 |
| rs181053839                                                            | 2    | <i>WDPCP</i>        | 63,486,141  | G  | 0.996 | 0.767   | 2.51E-08 | 256,850 |
| rs9949626                                                              | 18   | <i>LOC100131655</i> | 74,509,958  | C  | 0.470 | 1.033   | 3.02E-08 | 256,850 |
| <i>Accelerometry – Average acceleration</i>                            |      |                     |             |    |       |         |          |         |
| rs62055545                                                             | 17   | <i>MAPT-AS1</i>     | 43,964,561  | C  | 0.780 | -0.038  | 1.41E-09 | 67,808  |
| rs34517439                                                             | 1    | <i>FUBP1</i>        | 78,450,517  | C  | 0.880 | 0.044   | 4.23E-08 | 67,808  |
| rs4747438                                                              | 10   | <i>DNAJC1</i>       | 22,124,263  | C  | 0.320 | -0.030  | 4.62E-08 | 67,808  |
| <i>Accelerometry – Fraction accelerations &gt; 425 milli-gravities</i> |      |                     |             |    |       |         |          |         |
| rs10851869                                                             | 15   | <i>PML</i>          | 74,331,083  | T  | 0.570 | 0.027   | 3.66E-08 | 67,565  |

527  
528  
529

EA refers to effect allele that Beta/OR corresponds to. EAF: effect allele frequency;

530 **Table 3:** Meta-analysis of UK Biobank MVPA top hits with ARIC PA.

| SNP         | Chr. | Nearest Gene    | Position    | ARIC   |         | Meta-analysis |          |
|-------------|------|-----------------|-------------|--------|---------|---------------|----------|
|             |      |                 |             | Beta   | p-value | Beta          | p-value  |
| rs429358    | 19   | <i>APOE</i>     | 45,411,941  | -0.035 | 0.215   | -0.025        | 2.42E-11 |
| rs72737787  | 9    | <i>ZCCHC7</i>   | 37,336,741  | -0.028 | 0.080   | -0.018        | 9.26E-11 |
| rs1043595   | 7    | <i>CALU</i>     | 128,410,012 | 0.015  | 0.366   | 0.018         | 9.80E-10 |
| rs1921981   | 21   | <i>BACE2</i>    | 42,422,547  | 0.023  | 0.161   | 0.017         | 1.58E-09 |
| rs3129981   | 6    | <i>HCG20</i>    | 30,758,857  | 0.019* | 0.416   | 0.021         | 3.66E-09 |
| rs921917    | 7    | <i>C7orf72</i>  | 50,228,738  | -0.006 | 0.690   | -0.015        | 1.34E-08 |
| rs12147808  | 14   | <i>C14orf64</i> | 98,618,705  | -0.014 | 0.378   | -0.019        | 9.08E-09 |
| rs124672    | 8    | <i>KCNK9</i>    | 140,722,178 | 0.002  | 0.921   | -0.016        | 4.05E-08 |
| rs148854222 | 5    | <i>SLC1A3</i>   | 36,505,944  | 0.085  | 0.634   | -0.138        | 5.80E-08 |
| rs12142550  | 1    | <i>HAX1</i>     | 154,258,549 | -0.013 | 0.479   | 0.016         | 1.38E-07 |

531 \*used proxy SNP rs3131050 C allele

532

533 **Table 4:** Loci consistently associated with PA across all five measures (each  $p < 0.005$ ).

534

| SNP         | Chr. | Nearest Gene        | Position    | Effect Allele | MVPA   |          | VPA   |          | SSOE  |          | AA     |          | AF>425 |          |
|-------------|------|---------------------|-------------|---------------|--------|----------|-------|----------|-------|----------|--------|----------|--------|----------|
|             |      |                     |             |               | Beta   | p        | OR    | p        | OR    | p        | Beta   | p        | Beta   | p        |
| rs4361077   | 2    | <i>ACVR1</i>        | 158,556,835 | G             | 0.009  | 3.70E-03 | 1.032 | 1.11E-04 | 1.022 | 2.25E-03 | 0.028  | 4.93E-06 | 0.018  | 1.76E-03 |
| rs10930438  | 2    | <i>LOC101926913</i> | 171,606,871 | A             | -0.010 | 4.75E-04 | 0.973 | 2.38E-04 | 0.976 | 1.07E-04 | -0.022 | 9.09E-05 | -0.015 | 4.68E-03 |
| rs2113077   | 5    | <i>ISL1</i>         | 50,799,442  | A             | 0.009  | 1.07E-03 | 1.024 | 7.05E-04 | 1.029 | 2.32E-06 | 0.016  | 2.31E-03 | 0.016  | 1.08E-03 |
| rs1993246   | 7    | <i>KCCAT333</i>     | 17,477,177  | C             | -0.008 | 3.58E-03 | 0.976 | 5.39E-04 | 0.979 | 4.76E-04 | -0.016 | 2.74E-03 | -0.014 | 4.68E-03 |
| rs13284832  | 9    | <i>MAPKAP1</i>      | 128,435,126 | A             | -0.007 | 4.11E-03 | 0.975 | 1.76E-04 | 0.977 | 9.56E-05 | -0.021 | 4.06E-05 | -0.014 | 4.76E-03 |
| rs7910002   | 10   | <i>DNAJC1</i>       | 22,050,570  | G             | -0.009 | 8.73E-04 | 0.973 | 2.83E-04 | 0.982 | 4.47E-03 | -0.030 | 7.90E-08 | -0.020 | 1.03E-04 |
| rs9579775   | 13   | <i>ZMYM2</i>        | 20,616,557  | A             | 0.016  | 3.23E-05 | 1.045 | 1.82E-05 | 1.032 | 5.13E-04 | 0.023  | 2.95E-03 | 0.024  | 8.64E-04 |
| rs10135643  | 14   | <i>DCAF5</i>        | 69,517,406  | A             | 0.009  | 6.46E-04 | 1.027 | 1.72E-04 | 1.033 | 7.93E-08 | 0.019  | 4.57E-04 | 0.018  | 2.24E-04 |
| rs10145335  | 14   | <i>C14orf177</i>    | 98,547,748  | G             | -0.016 | 6.81E-08 | 0.973 | 3.98E-04 | 0.980 | 2.39E-03 | -0.018 | 3.03E-03 | -0.017 | 1.60E-03 |
| rs5742915   | 15   | <i>PML</i>          | 74,336,633  | T             | -0.012 | 3.67E-06 | 0.965 | 1.33E-07 | 0.973 | 3.14E-06 | -0.022 | 2.44E-05 | -0.022 | 3.04E-06 |
| rs185231044 | 17   | <i>RHBDL3</i>       | 30,637,986  | G             | -0.038 | 2.42E-04 | 0.921 | 2.38E-03 | 0.920 | 3.82E-04 | -0.064 | 1.97E-03 | -0.060 | 1.73E-03 |
| rs113351744 | 18   | <i>LINC01029</i>    | 75,585,414  | G             | -0.030 | 4.59E-03 | 0.908 | 3.58E-04 | 0.899 | 5.77E-06 | -0.063 | 2.30E-03 | -0.058 | 2.43E-03 |
| rs12460611  | 19   | <i>CCNE1</i>        | 30,326,600  | A             | 0.009  | 2.15E-03 | 1.029 | 1.25E-04 | 1.026 | 4.69E-05 | 0.026  | 4.01E-06 | 0.021  | 2.94E-05 |

535 SSOE: Strenuous sports or other exercises; AA: Average acceleration, AF>425: acceleration fraction  
 536 greater than 425mg.

537

538 **Figure 1**

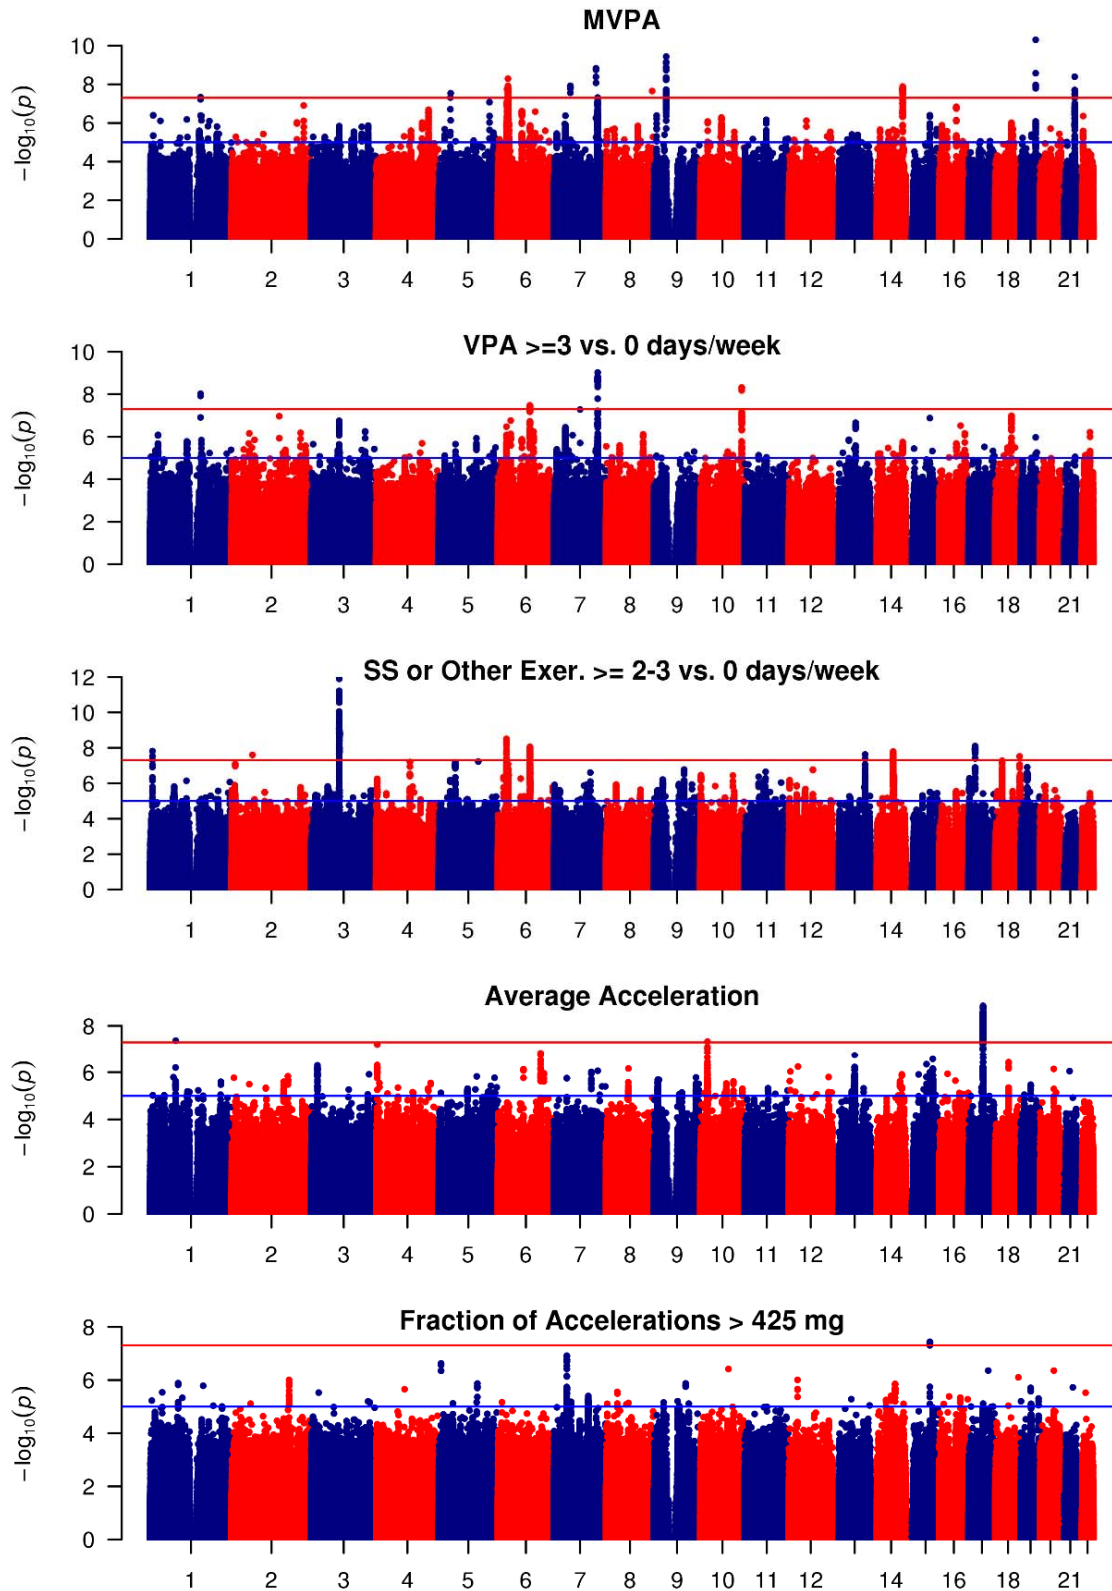

539

540 **Figure 2**

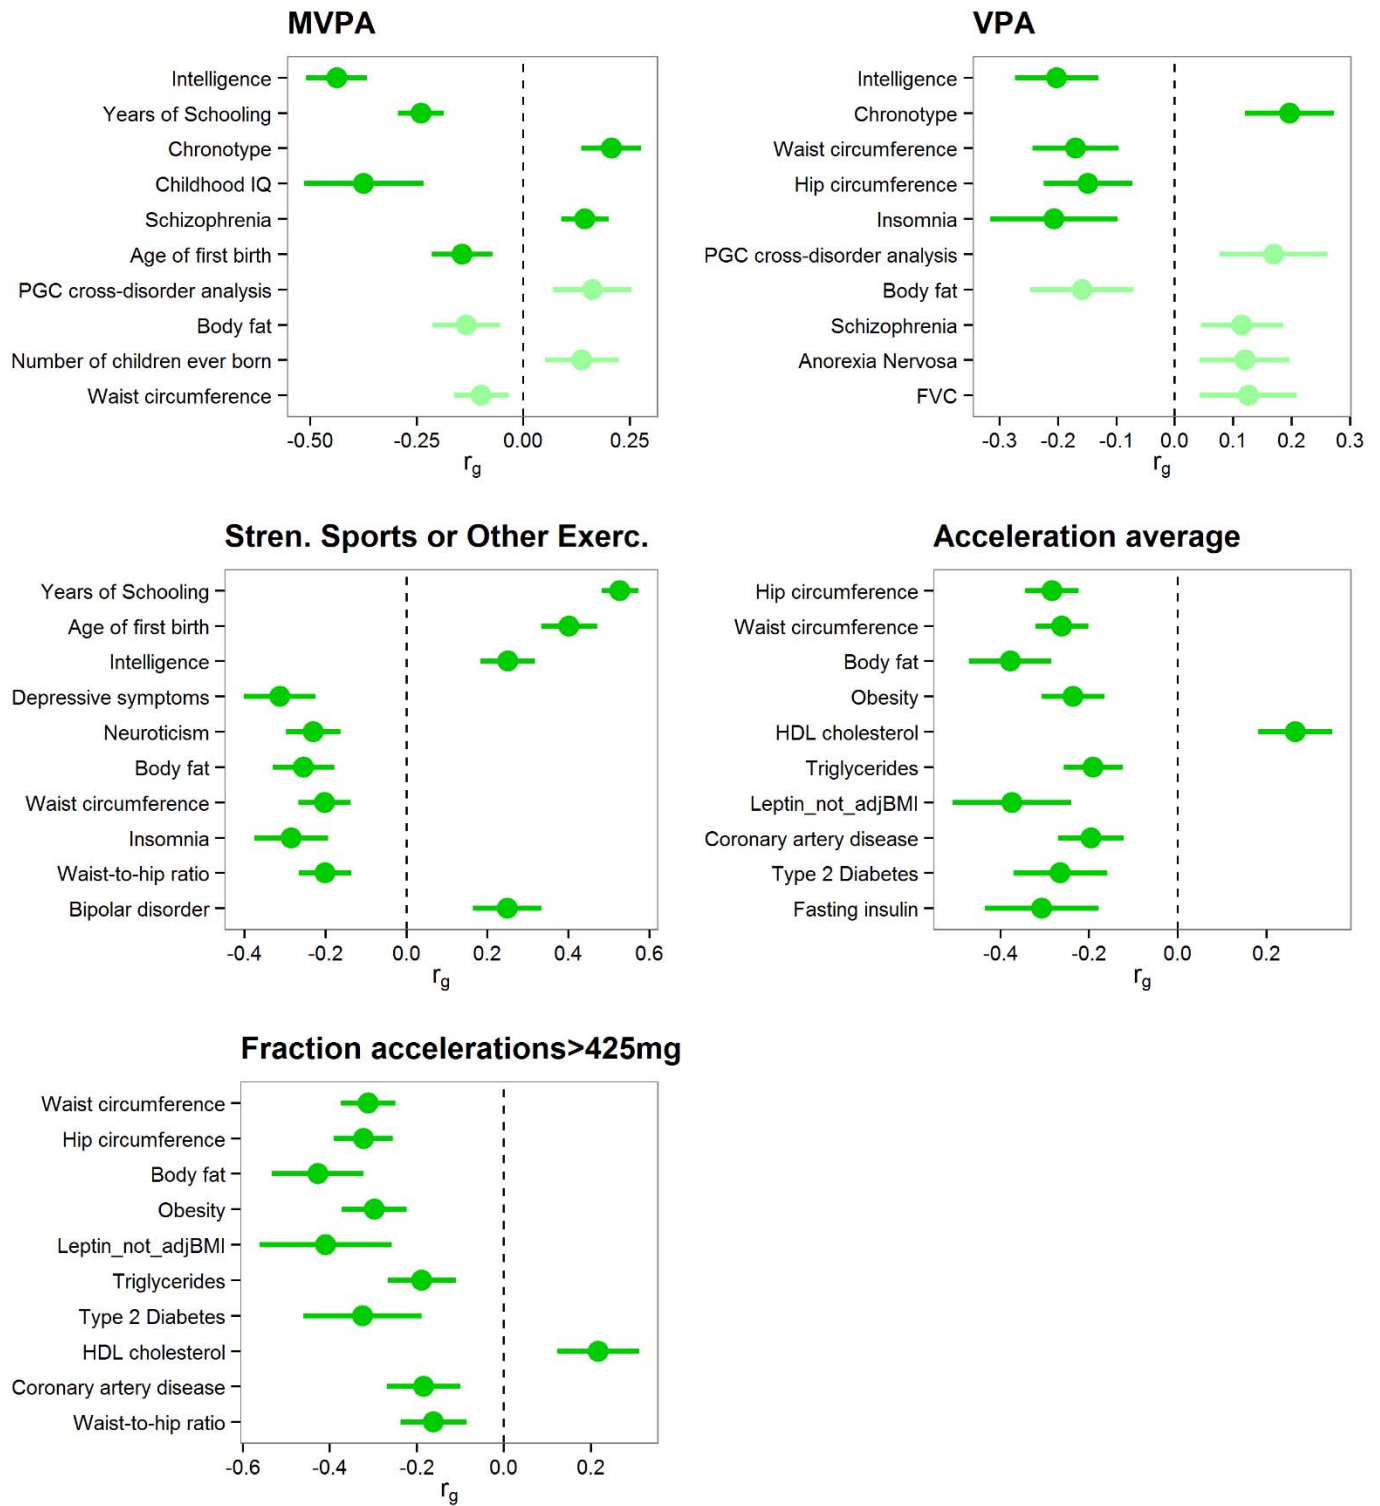

541

542 **Figure 3**

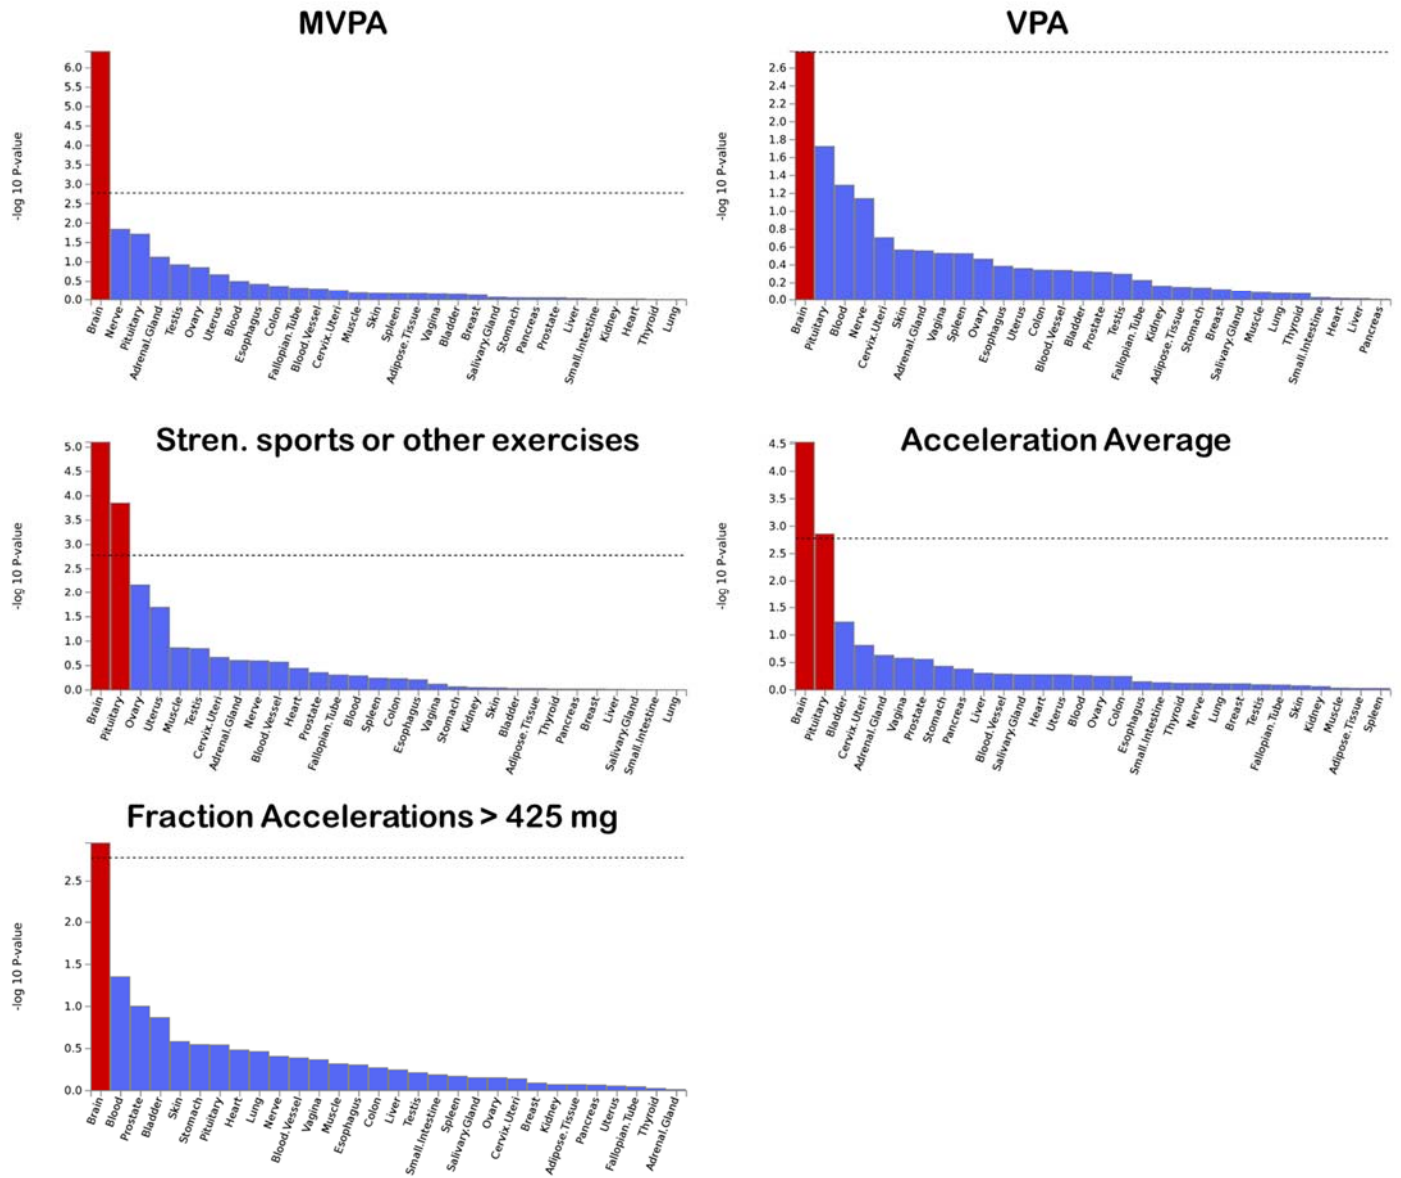

543

544

545

546

547
